# Supplementary material for: Platelet-derived growth factor (PDGF) signaling directs cardiomyocyte movement toward the midline during heart tube assembly
Source: eLife journal article supplement (doi:10.7554/elife.21172), 2017-01-18
Supplement: supp [file elife-21172-supp-v1.zip]

Archive with 13 entries (13 files):
- elife_poa_e21172_Figure_Supplement.jpg
- elife_poa_e21172_Figure_2_Figure_Supplement_1.jpg
- elife_poa_e21172_Reviewer_Figure_2.pdf
- elife_poa_e21172_Figure_5_Figure_Supplement_2.jpg
- elife_poa_e21172_Video_S2.mp4
- elife_poa_e21172_Video_S1.mp4
- elife_poa_e21172_Video_S3.mp4
- elife_poa_e21172_Figure_1_Figure_Supplement_1.jpg
- elife_poa_e21172_Reviewer_Figure_1.pdf
- elife_poa_e21172_Figure_1_Figure_Supplement_2.jpg
- elife_poa_e21172_Figure_2_Figure_Supplement_2.jpg
- elife_poa_e21172_Figure_5_Figure_Supplement_1.jpg
- elife_poa_e21172_Figure_7_Figure_Supplement_1.jpg
