# Supplementary material for: Platelet-derived growth factor (PDGF) signaling directs cardiomyocyte movement toward the midline during heart tube assembly
Source: eLife journal article supplement (doi:10.7554/elife.21172), 2017-01-18
Supplement: supp [file elife-21172-supp-v1.zip › elife_poa_e21172_Reviewer_Figure_1.pdf]

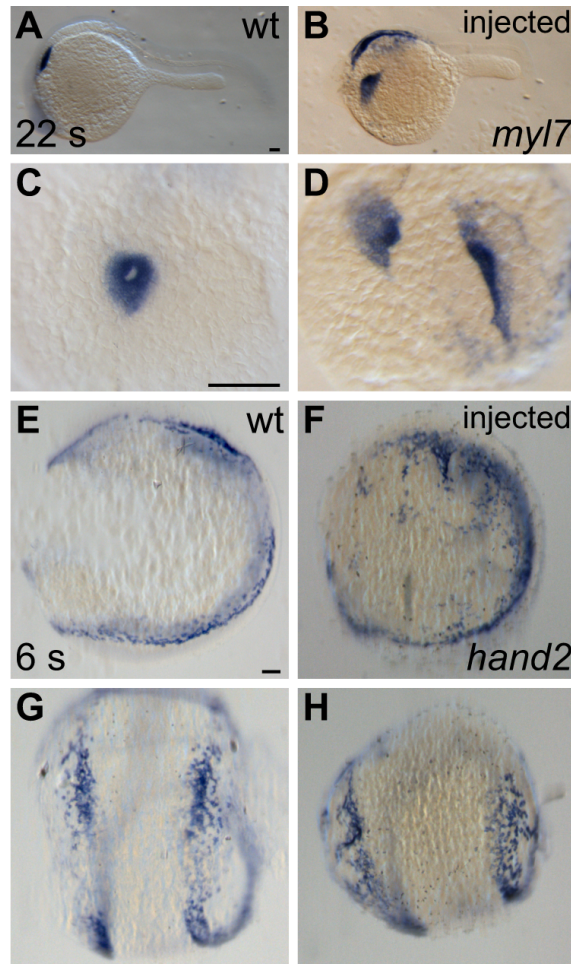

**Reviewer Figure 1. Mosaic expression of *pdgfaa* in the endoderm causes defects in cardiac fusion and ALPM formation.**

**(A-D)** Lateral (A,B) and dorsal (C,D) views depict the expression of *myl7* at 22 s in a representative uninjected embryo (wt; A,C) and in a representative embryo injected with *Tg(sox17:pdgfaa-2A-mCherry)* plasmid (injected; B,D). Injected embryos exhibited a range of cardiac fusion phenotypes: cardia bifida with disrupted morphology (B,D; n=6/14), fusion only in posterior positions (not shown; n=3/14), or normal fusion (n=5/14).

**(E-H)** Lateral (E,F) and dorsal (G,H) views depict the expression of *hand2* at 6 s in a representative uninjected embryo (wt; E,G) and in a representative embryo injected with *Tg(sox17:pdgfaa-2A-mCherry)* plasmid (injected; F,H). Instead of being confined to narrow bilateral stripes of ALPM as in wt (E,G), *hand2* was expressed ectopically in some injected embryos (F,H; n=2/11) or expressed in a dysmorphic ALPM (not shown; n=5/11). Normal *hand2* expression was observed in a few injected embryos (n=4/11).

Scale bars: 60  $\mu$ m.
