# Supplementary material for: Platelet-derived growth factor (PDGF) signaling directs cardiomyocyte movement toward the midline during heart tube assembly
Source: eLife journal article supplement (doi:10.7554/elife.21172), 2017-01-18
Supplement: supp [file elife-21172-supp-v1.zip › elife_poa_e21172_Reviewer_Figure_2.pdf]

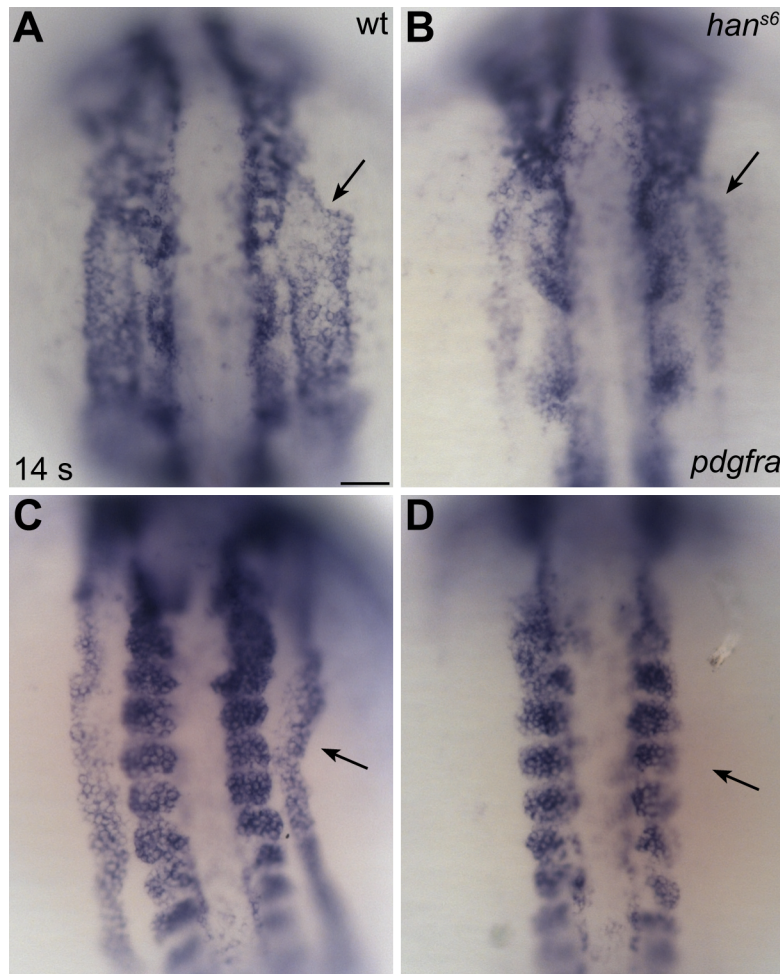

**Reviewer Figure 2. Expression of *pdgfra* is diminished in the lateral plate mesoderm of *hand2* mutants.**

**(A-D)** Dorsal views, anterior to the top, depict the expression of *pdgfra* in wt (A,C) and *hand2* (*han<sup>s6</sup>*) mutant (B,D) embryos at 14 s. Arrows indicate location of the lateral plate mesoderm in the anterior (A,B) and posterior (C,D) regions of the embryo. Expression of *pdgfra* is reduced in the anterior lateral plate mesoderm (B) and absent in the posterior lateral plate mesoderm (D) of *hand2* mutants.

Scale bar: 60  $\mu$ m.
