# Supplementary figures and images for: Platelet-derived growth factor (PDGF) signaling directs cardiomyocyte movement toward the midline during heart tube assembly
Source: eLife journal article supplement (doi:10.7554/elife.21172), 2017-01-18

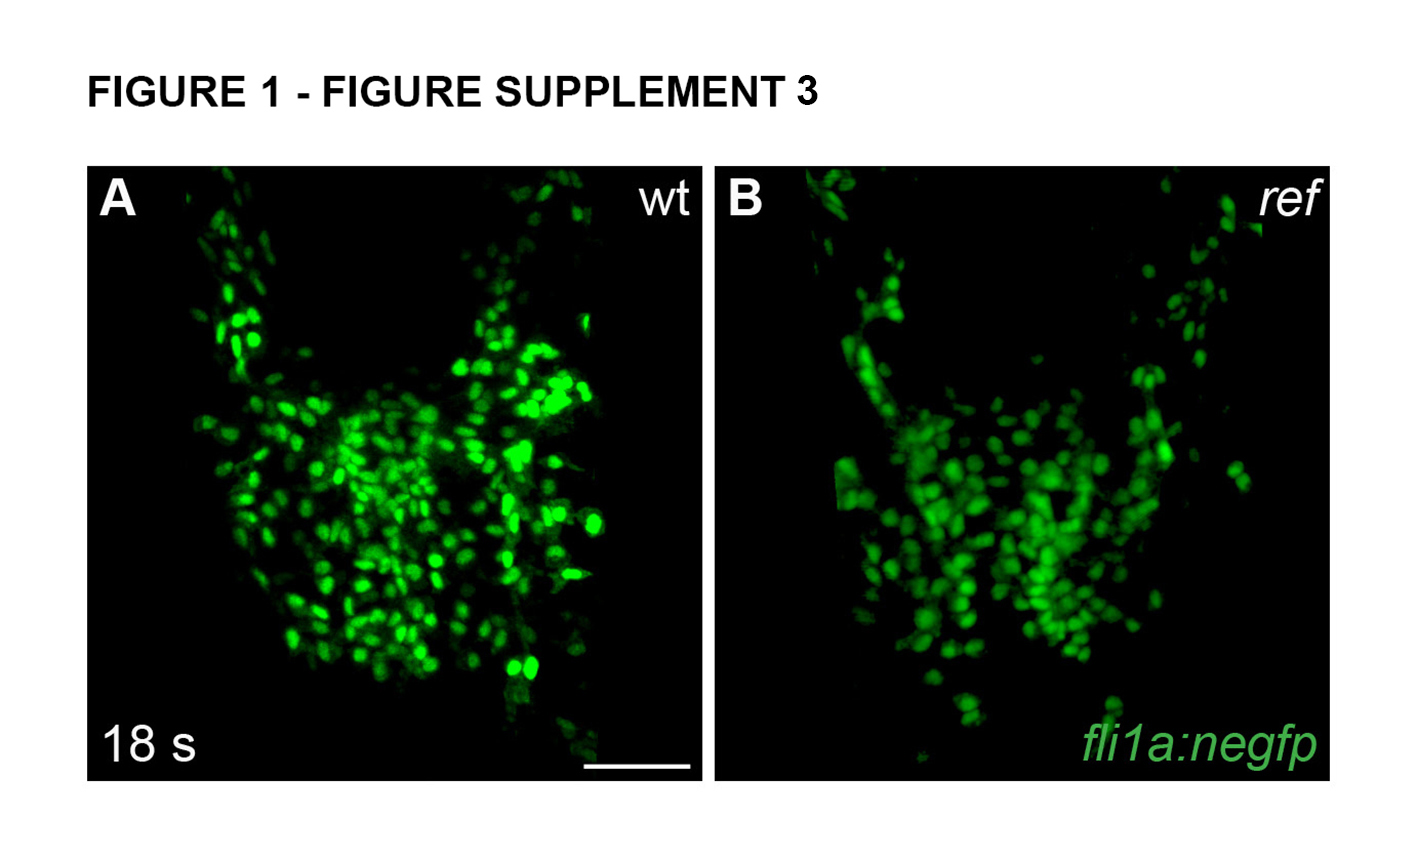

Supplement: supp [file elife-21172-supp-v1.zip › elife_poa_e21172_Figure_Supplement.jpg]

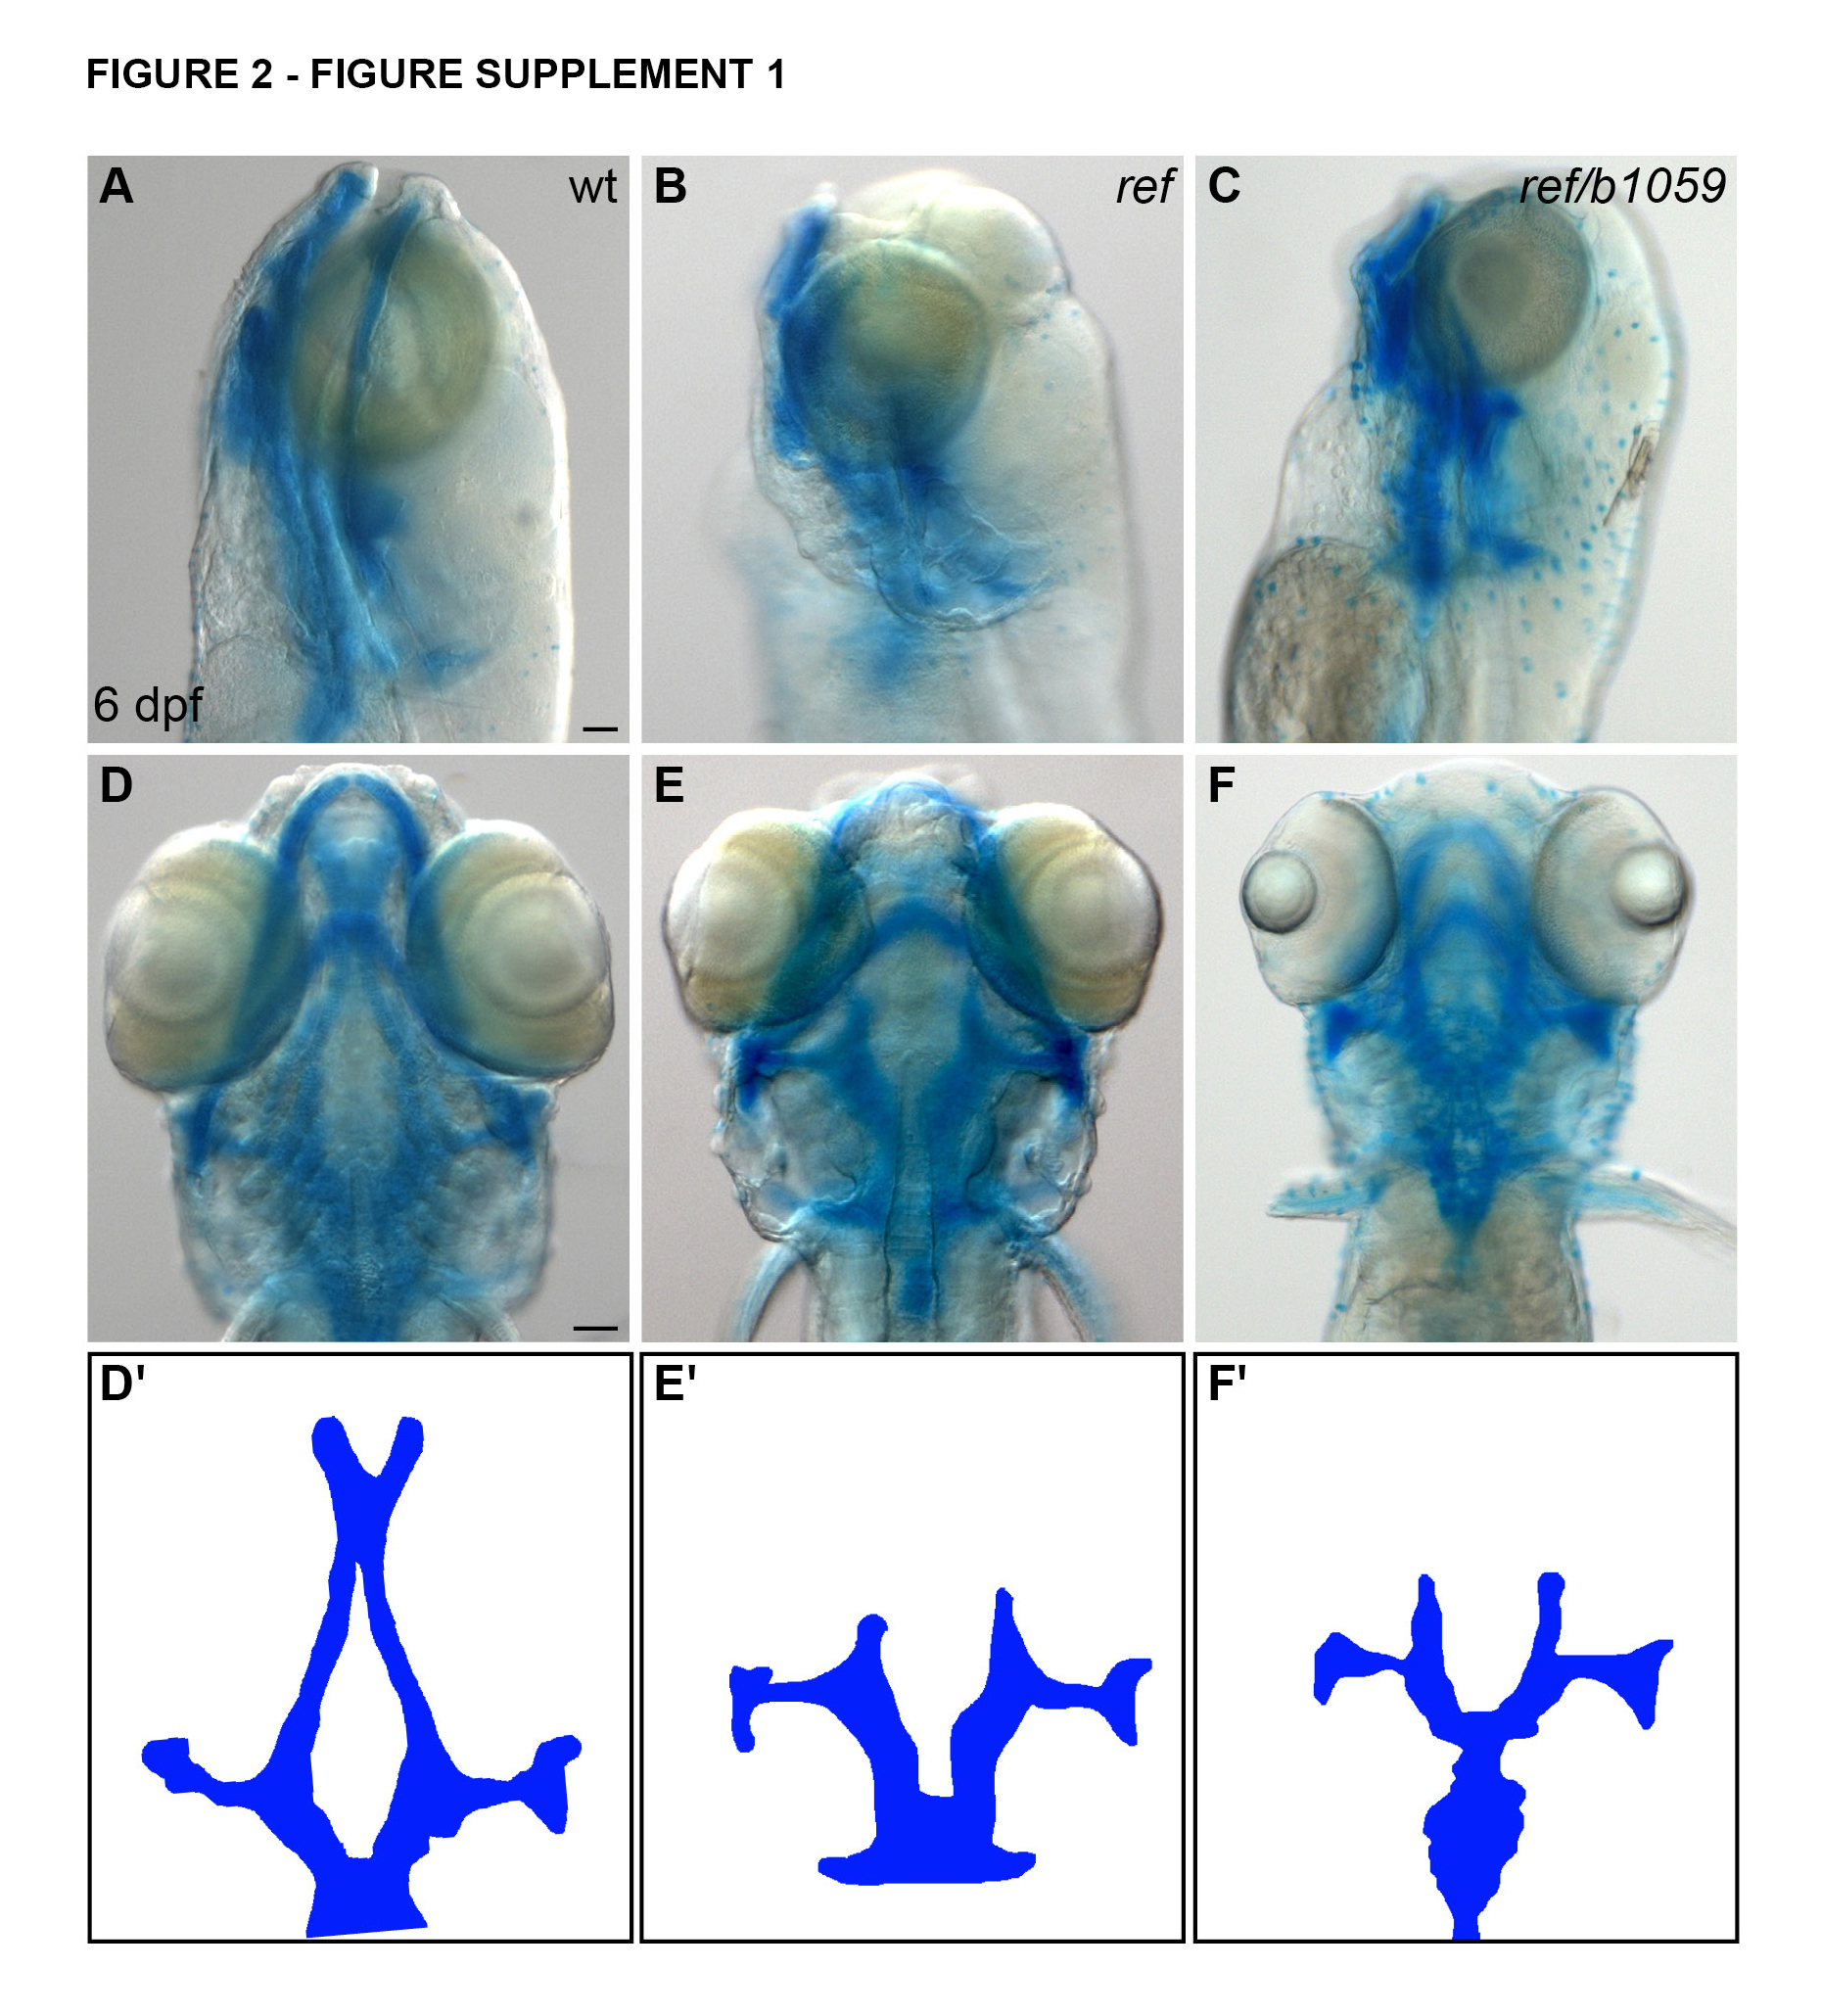

Supplement: supp [file elife-21172-supp-v1.zip › elife_poa_e21172_Figure_2_Figure_Supplement_1.jpg]

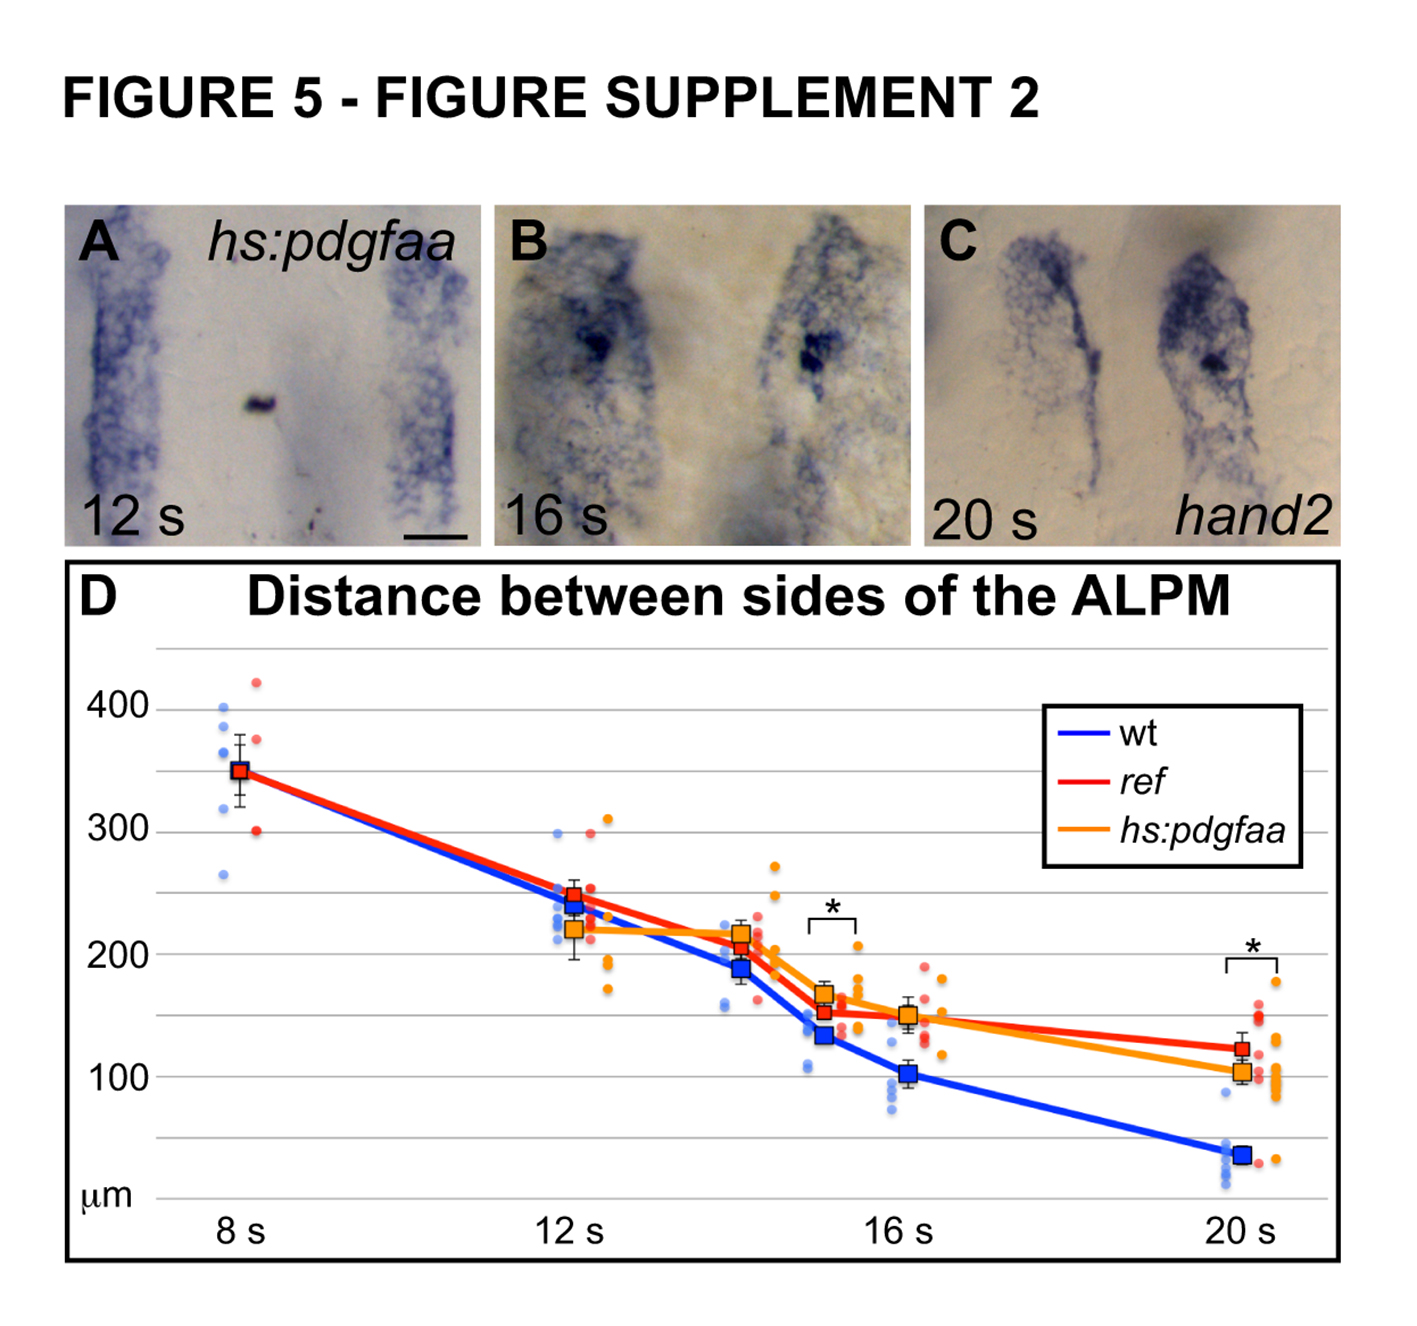

Supplement: supp [file elife-21172-supp-v1.zip › elife_poa_e21172_Figure_5_Figure_Supplement_2.jpg]

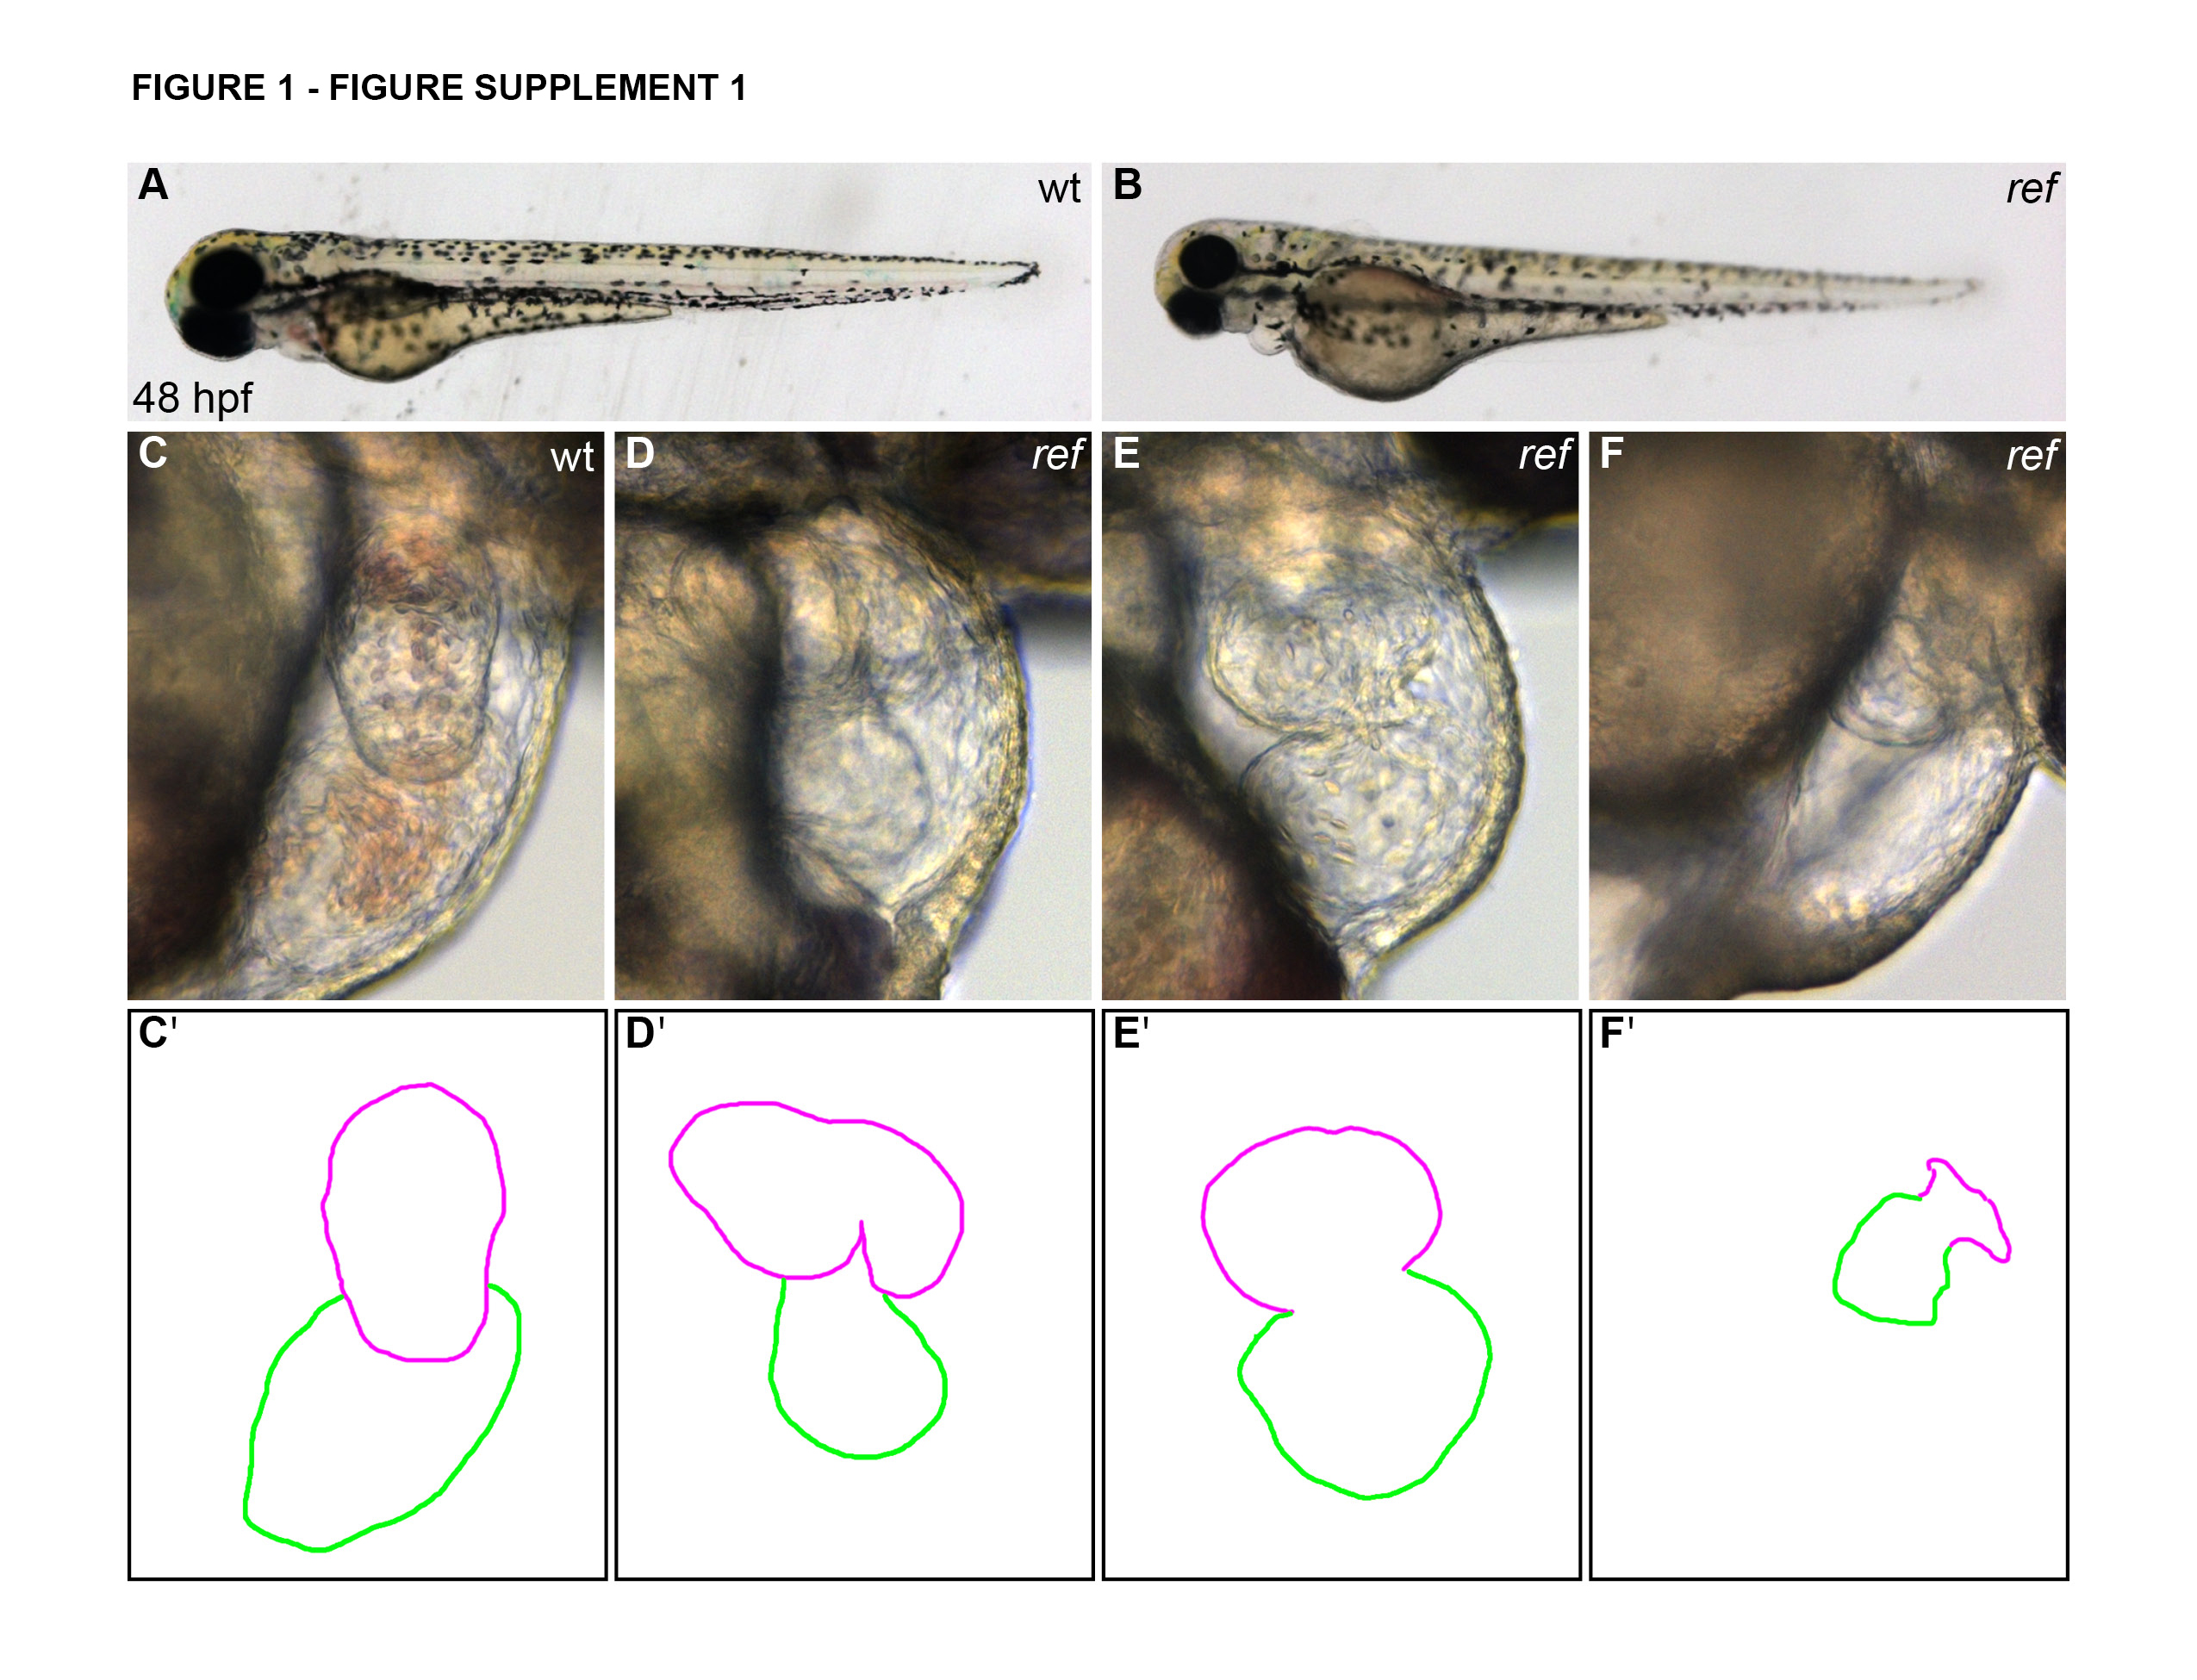

Supplement: supp [file elife-21172-supp-v1.zip › elife_poa_e21172_Figure_1_Figure_Supplement_1.jpg]

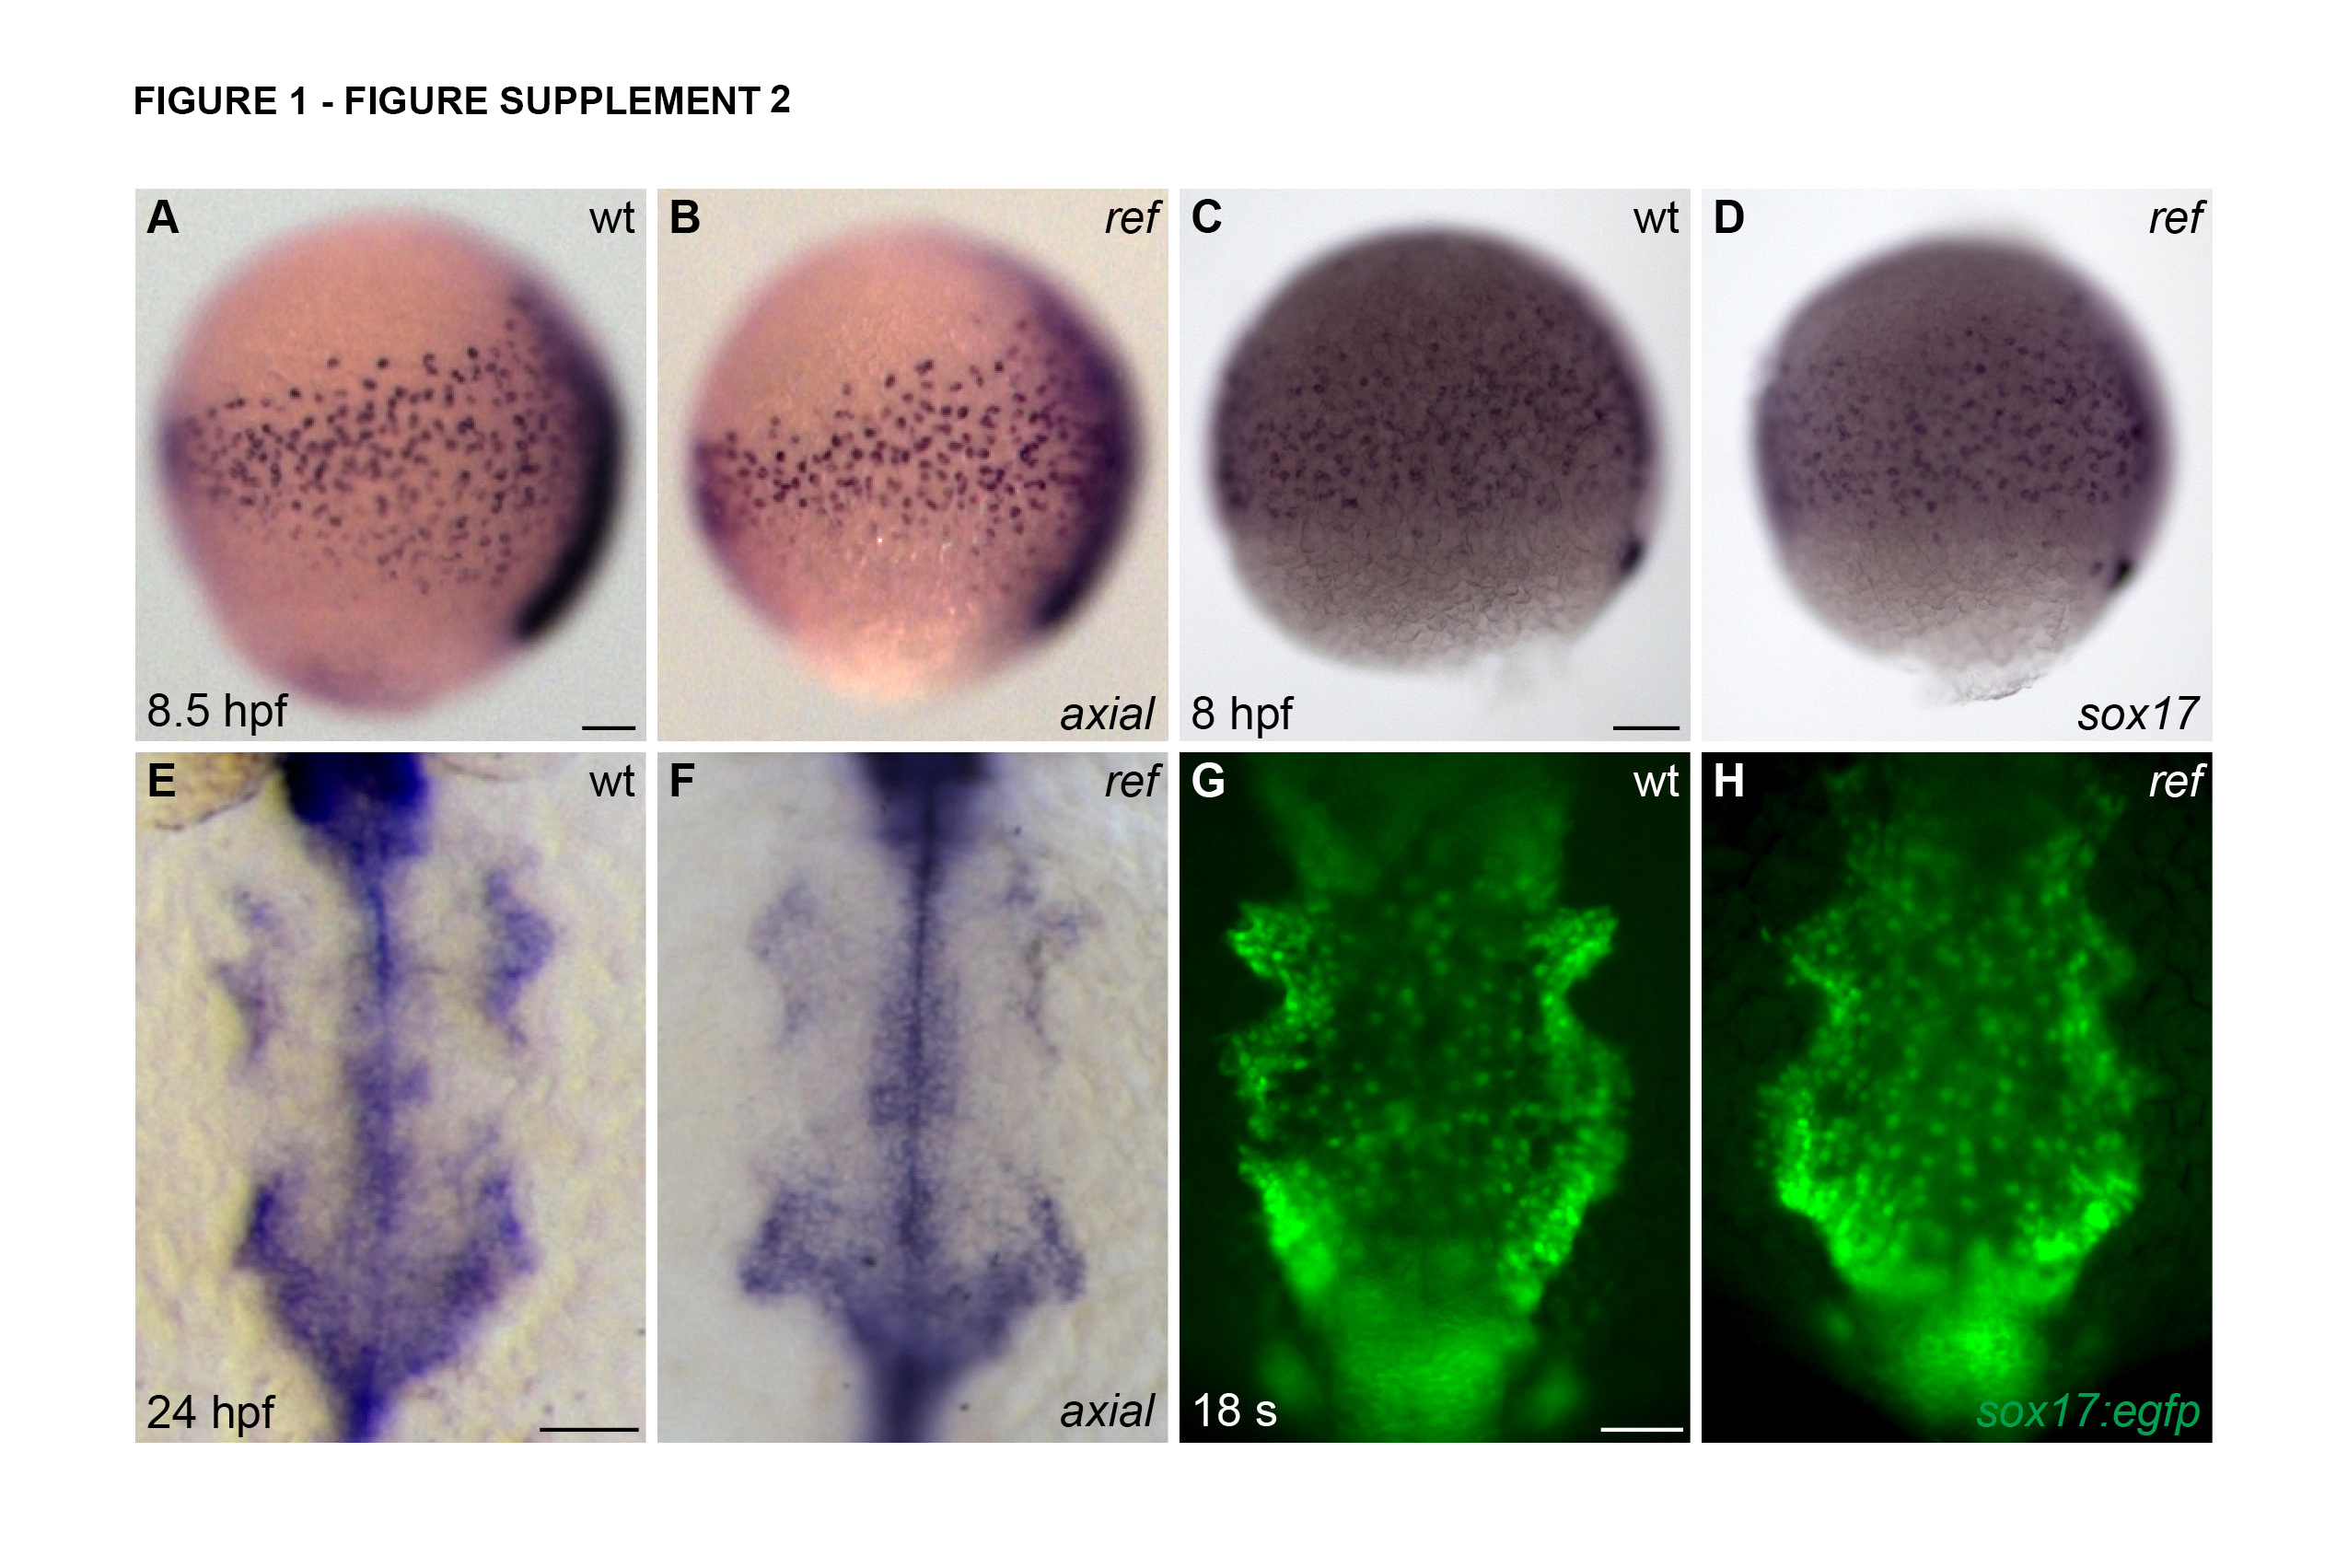

Supplement: supp [file elife-21172-supp-v1.zip › elife_poa_e21172_Figure_1_Figure_Supplement_2.jpg]

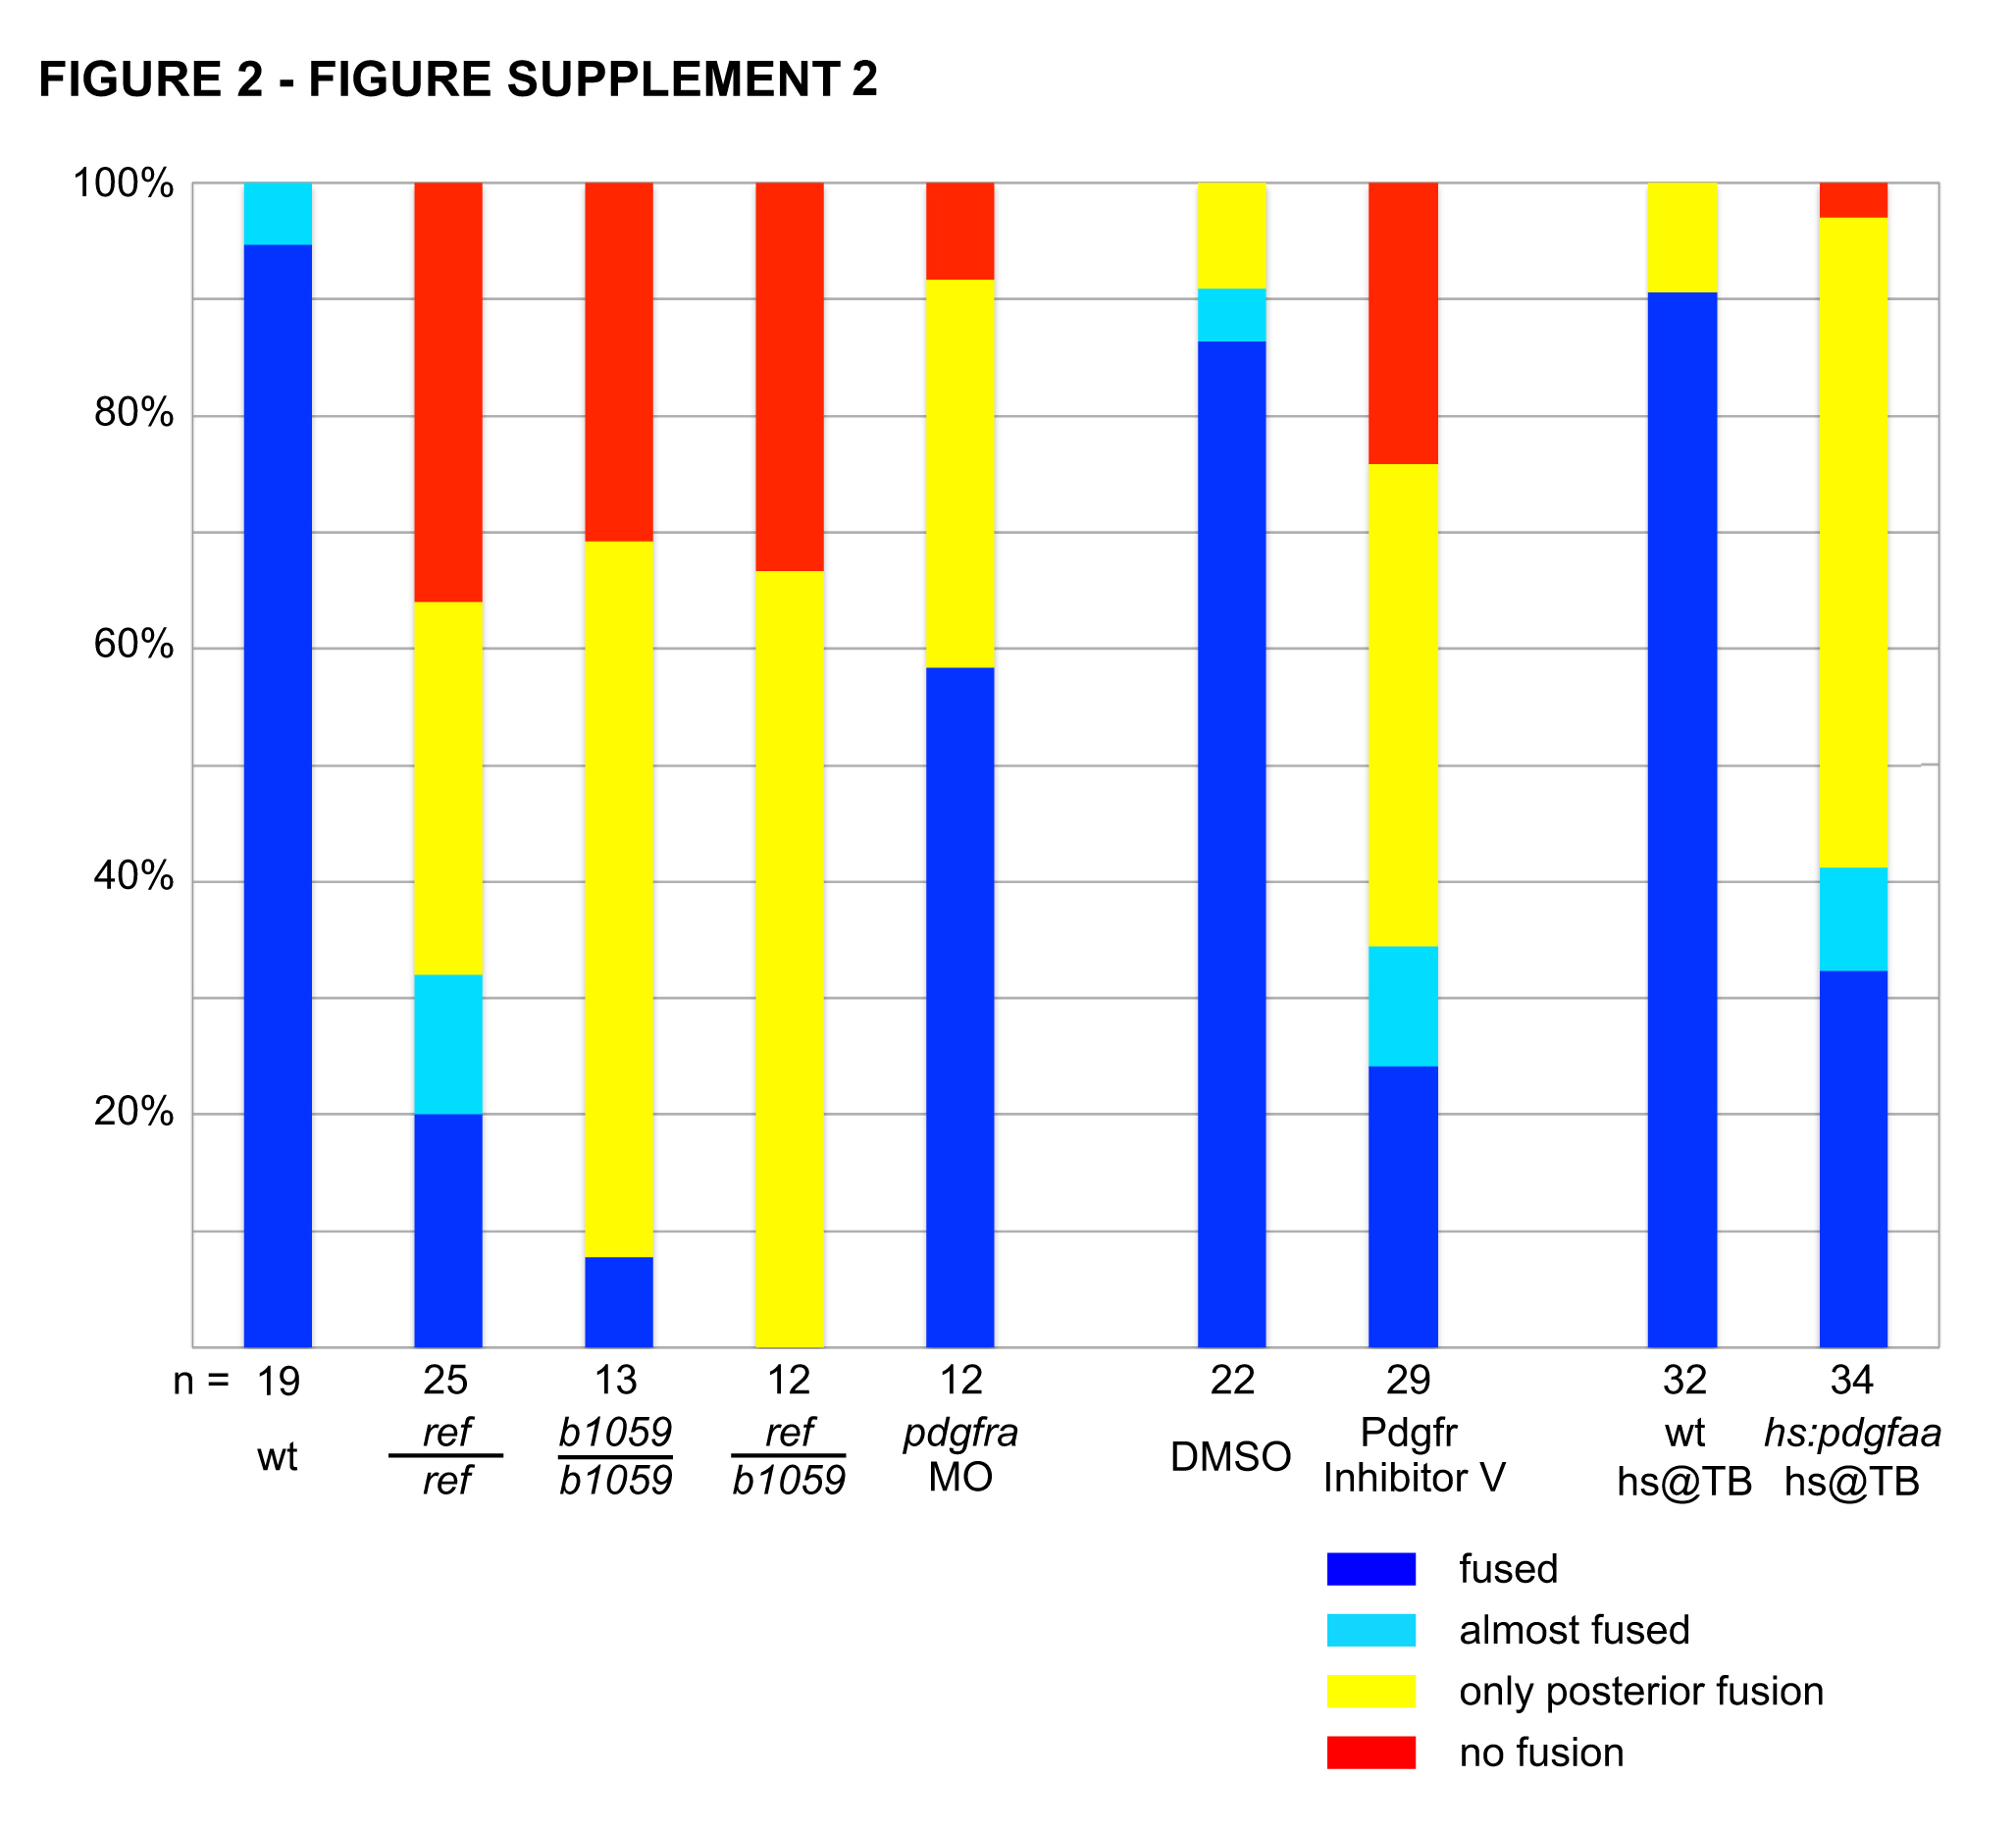

Supplement: supp [file elife-21172-supp-v1.zip › elife_poa_e21172_Figure_2_Figure_Supplement_2.jpg]

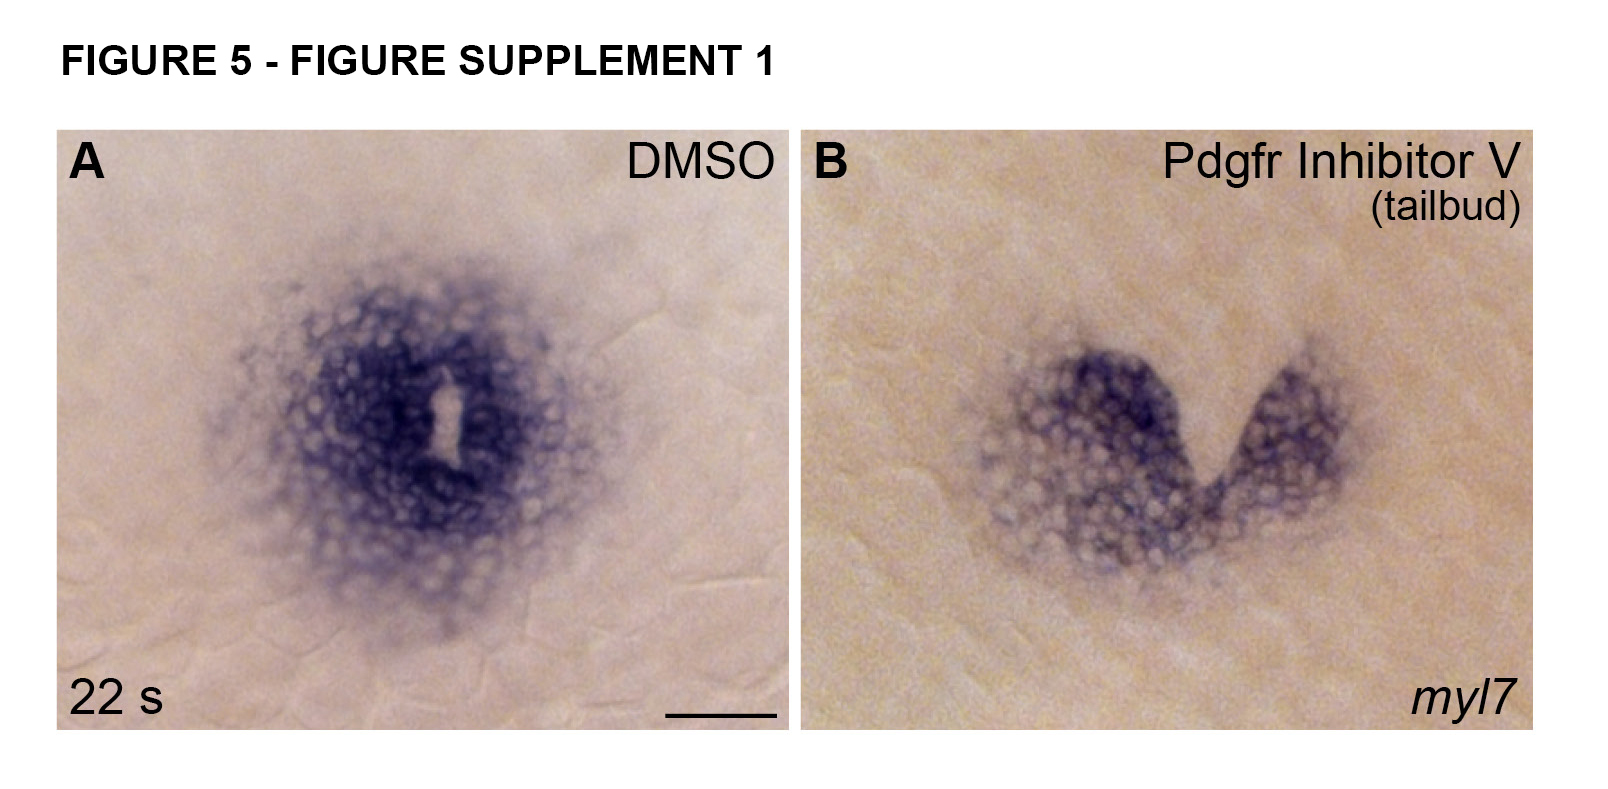

Supplement: supp [file elife-21172-supp-v1.zip › elife_poa_e21172_Figure_5_Figure_Supplement_1.jpg]

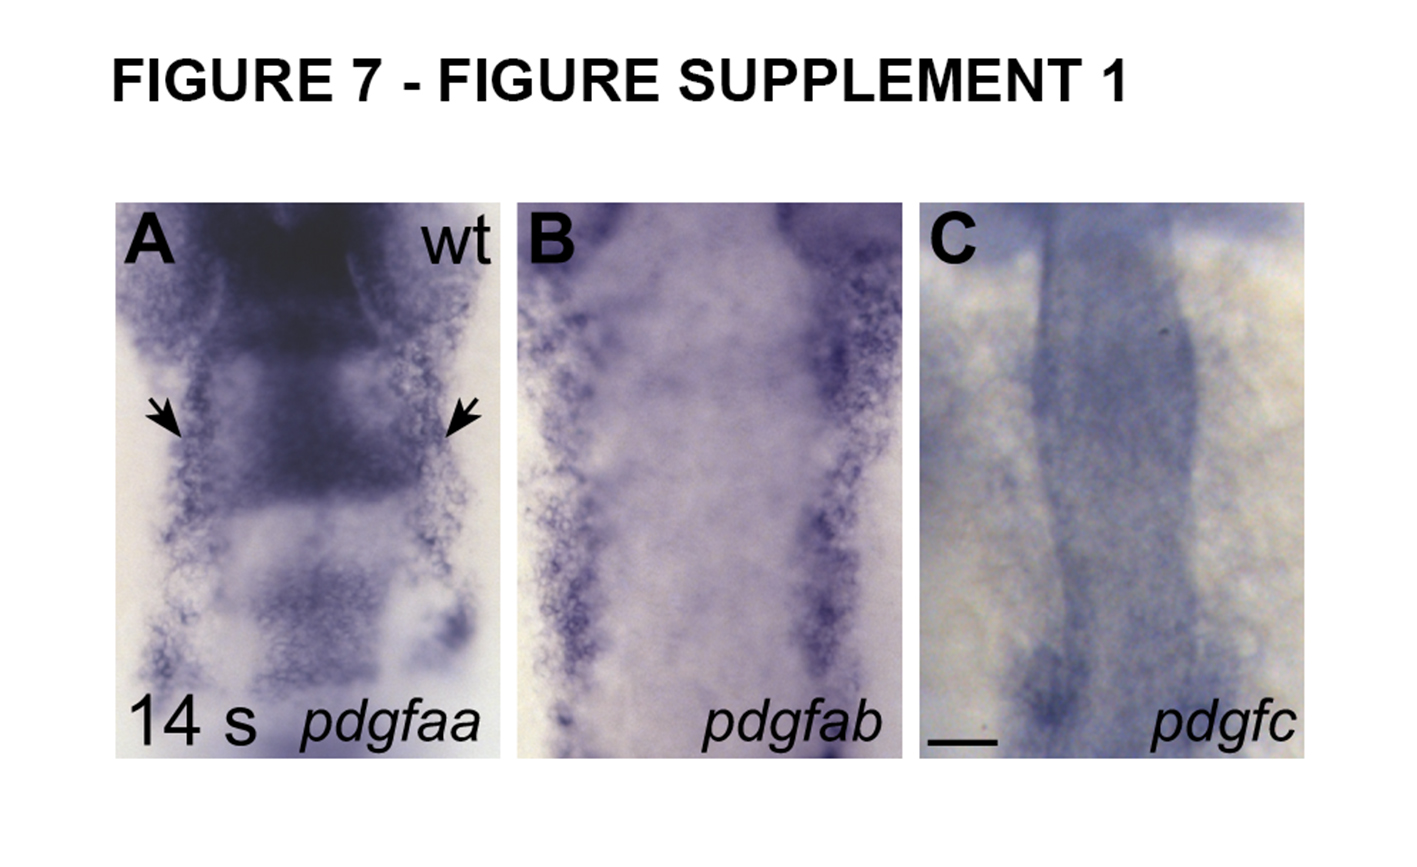

Supplement: supp [file elife-21172-supp-v1.zip › elife_poa_e21172_Figure_7_Figure_Supplement_1.jpg]
